# Supplementary material
Source: publisher figshare collection journal article supplement (https://acs.figshare.com/ndownloader/files/4110166)
Supplement: Supplementary file 1 [file 4110166]

**Supporting Information for**

**Photochemical strategies for the seed-mediated growth of gold and gold-silver nanoparticles**

by

*Katherine L. McGilvray,<sup>#</sup> Chiara Fasciani,<sup>#</sup> Carlos J. Bueno-Alejo, Rachel Schwartz-Narbonne  
and Juan C. Scaiano<sup>\*</sup>*

Department of Chemistry and Centre for Catalysis Research and Innovation, University of  
Ottawa, 10 Marie Curie, Ottawa K1N 6N5, Canada

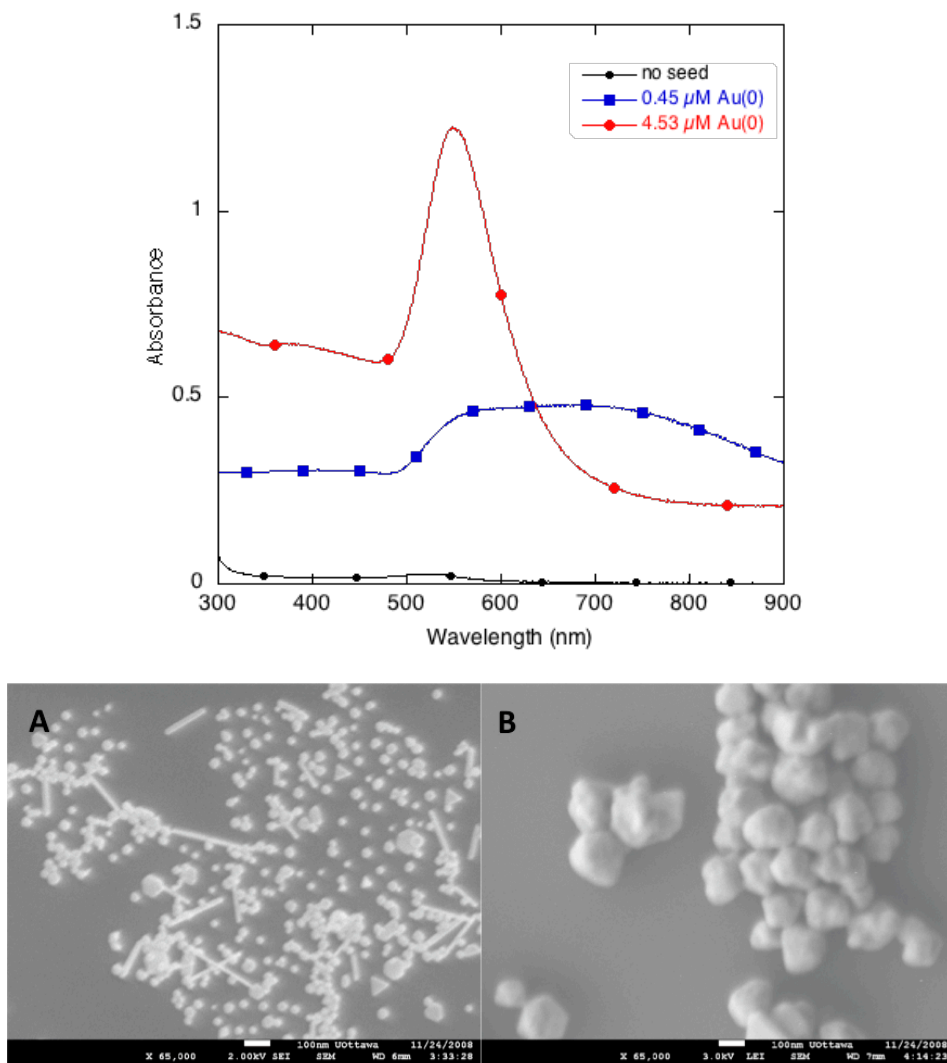

**Figure S1.** Absorption spectrum of AuNP prepared from  $\text{NH}_2\text{OH}\cdot\text{HCl}$  seeding at different concentrations of seed particle added to a growth solution containing 0.25 mM  $\text{HAuCl}_4$  and 0.4 mM  $\text{NH}_2\text{OH}\cdot\text{HCl}$ . SEM images of AuNP prepared via thermal seeding, as illustrated in the corresponding UV-VIS spectra. Images reflect samples prepared from seed concentrations (expressed in atoms of gold) of  $4.53 \mu\text{M Au}^0$  (A) and  $0.45 \mu\text{M Au}^0$  (B). Scale bars each represent 100 nm.

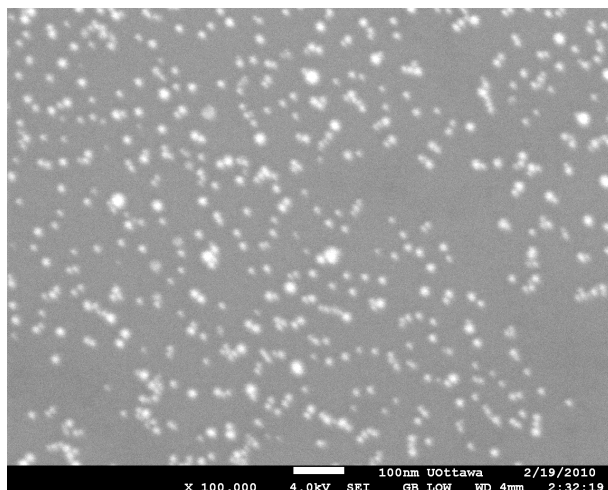

**Figure S2** – SEM image of AuNP prepared from 15 minute UVA photolysis of 0.33 mM HAuCl<sub>4</sub> and 1.90 mM I-2959. These photochemically generated AuNP were used as seeds for further photochemical growth.

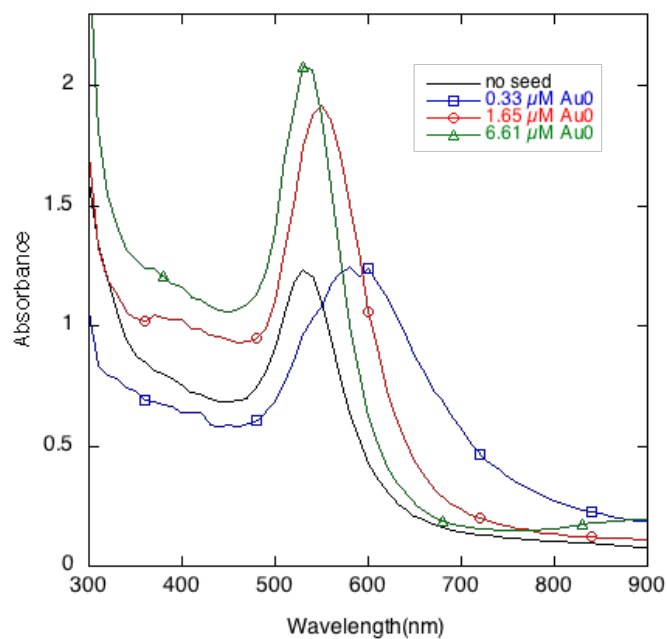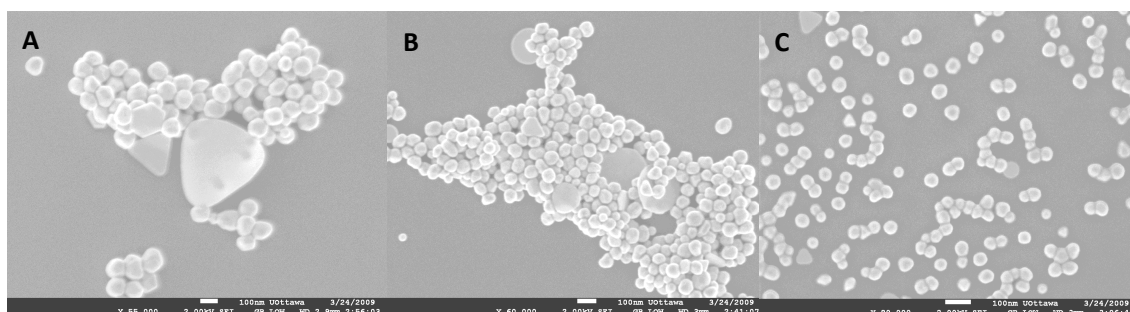

**Figure S3** - Absorption spectrum of AuNP prepared from I-2959 seeding at different concentrations of seed particle added to a growth solution containing 0.25 mM HAuCl<sub>4</sub> and 0.4 mM I-2959 followed by 30 minutes photolysis. SEM Images reflect samples prepared from seed concentrations (expressed in atoms of gold) of 6.61  $\mu\text{M Au}^0$  (A), 1.65  $\mu\text{M Au}^0$  (B) and 0.33  $\mu\text{M Au}^0$  (C). Scale bars all represent 100 nm.

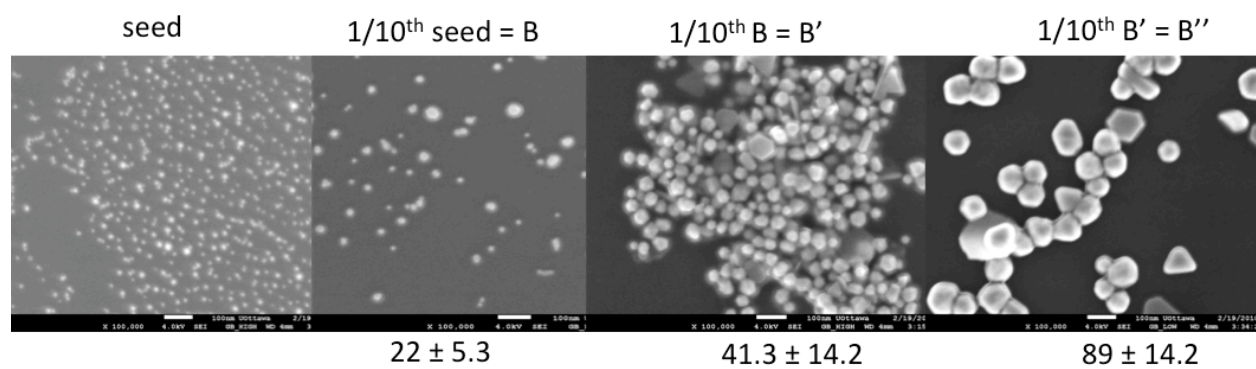

**Figure S4** – SEM images of AuNP prepared from subsequent seeded growth following the I-2959 method and protocol B. 1/10<sup>th</sup> vol. AuNP seed is added to 9/10<sup>th</sup> volume growth solution containing 0.5 mM HAuCl<sub>4</sub> and 0.25 mM I-2959. Scale bars represent 100 nm.

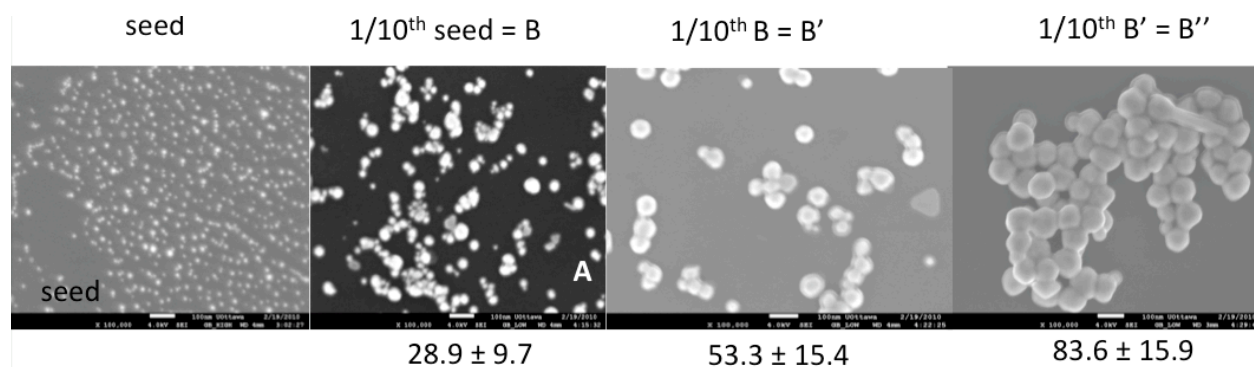

**Figure S5** – SEM images of AuNP prepared from subsequent seeded growth following the H<sub>2</sub>O<sub>2</sub> method and protocol B. 1/10<sup>th</sup> vol. AuNP seed is added to 9/10<sup>th</sup> volume growth solution containing 0.5 mM HAuCl<sub>4</sub> and 0.5 mM H<sub>2</sub>O<sub>2</sub>. Scale bars represent 100 nm.

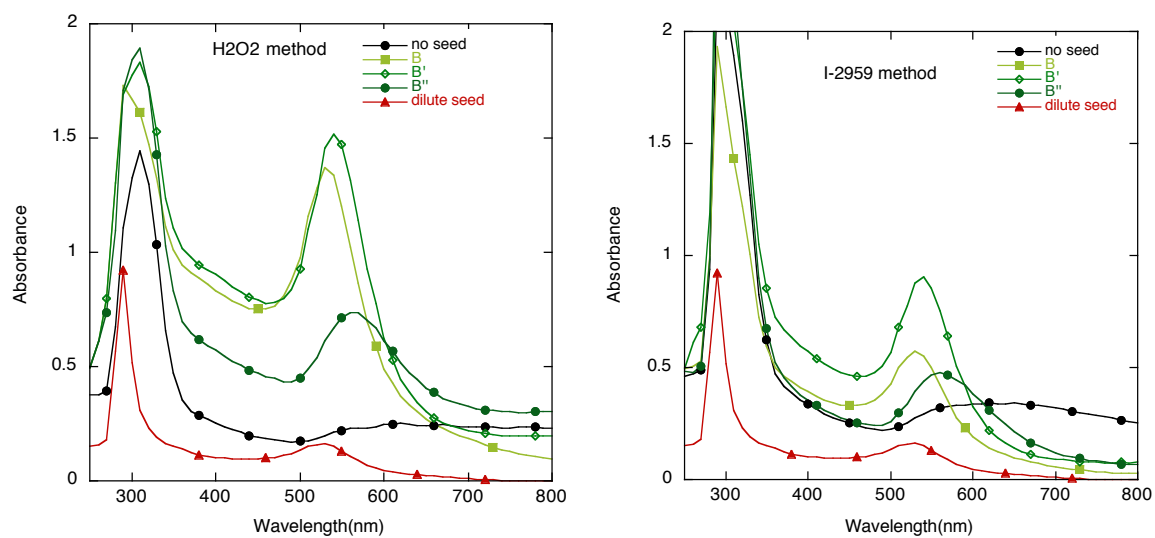

**Figure S6.** UV-Vis absorbance of seeded AuNP following protocol B following the H<sub>2</sub>O<sub>2</sub> method (left) and the I-2959 method (right). Significant abs at 300 nm is observed in all seeding solutions, relative to the traces of the thermal approach of Figure S3.

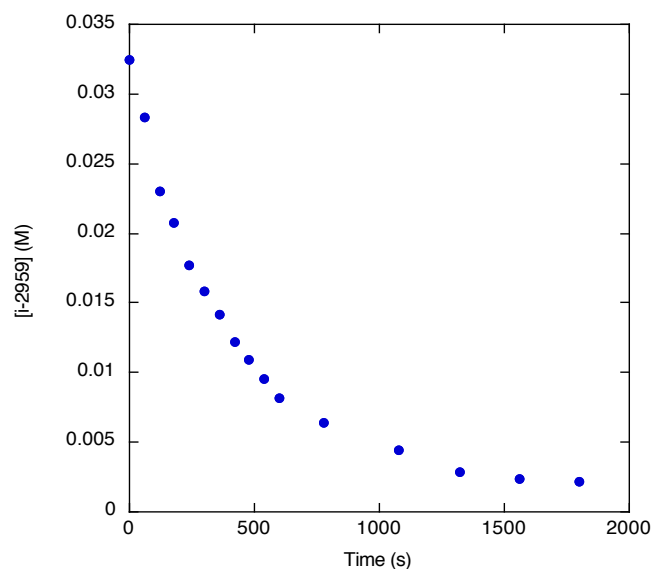

**Figure S7.** UV-Absorption at 272 nm vs time for the decay of I-2959. A 6.0 mM I-2959 solution in acetonitrile was photolyzed with 35.9 W/m<sup>2</sup> UVA for 30 minutes, and aliquots were taken out periodically for analysis by HPLC. All samples were then analyzed by HPLC.

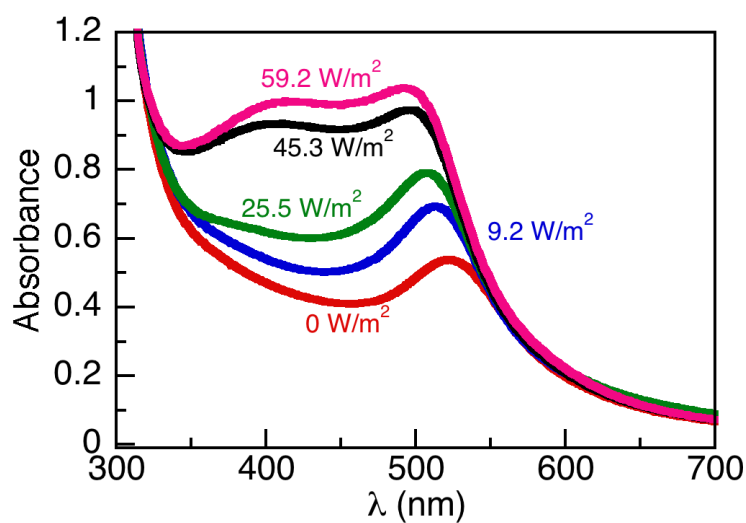

**Figure S8.** UV absorption spectra of 50:50 Au/Ag core shell after 2 min irradiation at different light irradiances.

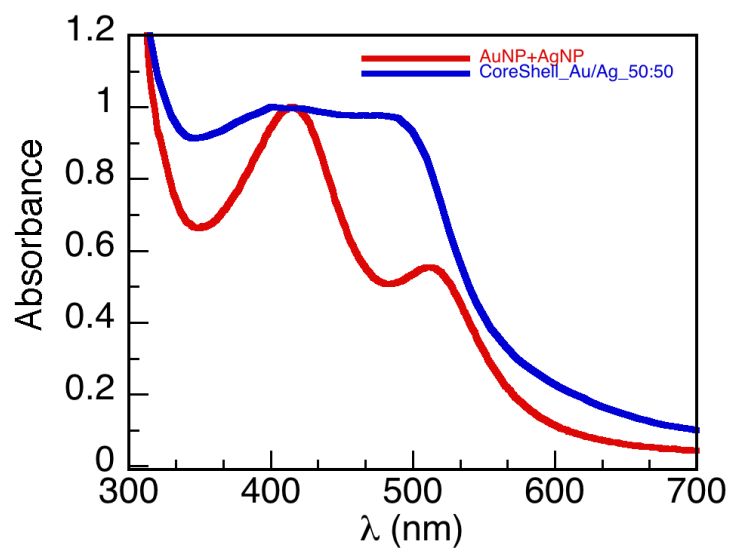

**Figure S9.** Normalized UV absorption spectra of 50:50 Au/Ag core shell (blue trace) and the mixture of AuNP and AgNP (red trace).
